---

## Corrections

*MDL 72527 and spermine oxidation products induce a lysosomotropic effect and mitochondrial alterations in tumour cells*

Enzo Agostinelli, Giampiero Tempera, Laura Dalla Vedova, Maria Condello and Giuseppe Arancia

Volume 35 Part 2 (2007) 343–348

The legend to Figure 1 neglected to state that the graph has been plotted using data taken from two different earlier publications by the corresponding author. Lines labelled a, b, e-f and g-h use data taken from [3] and lines labelled c and d use data taken from [16].

*Fos family protein degradation by the proteasome*

Tiphanie Gomard, Isabelle Jariel-Encontre, Jihane Basbous, Guillaume Bossis, Gabriel Moquet-Torcy and Marc Piechaczyk

Volume 36 Part 5 (2008) 858–863

In this article, Dr Moquet-Torcy's name was spelt incorrectly. It appears correctly here.
